# Supplementary material for: The relationship between poison frog chemical defenses and age, body size, and sex
Source: PubMed Central journal article supplement (PMC4591705; doi:10.1186/s12983-015-0120-2), 2015-10-01
Supplement: 12983_2015_120_MOESM1_ESM.pdf [file 12983_2015_120_MOESM1_ESM.pdf]

**Additional file 1**

Results of *t*-tests comparing the sizes (snout-vent length) of adult females and males of the same age. All *P*-values remained significant following sequential Bonferroni test for table-wide significance.

| Age (years) | Mean female size (mm) | Mean male size (mm) | <i>t</i> | DF | <i>P</i>         |
|-------------|-----------------------|---------------------|----------|----|------------------|
| 3           | 26.32                 | 23.76               | 6.1489   | 2  | <b>0.02544</b>   |
| 4           | 26.52                 | 23.28               | 7.3265   | 19 | <b>6.032e-07</b> |
| 5           | 26.03                 | 23.52               | 5.0034   | 17 | <b>0.0001088</b> |
| 6           | 26.068                | 23.400              | 3.3004   | 5  | <b>0.02147</b>   |
