# Supplementary material for: The relationship between poison frog chemical defenses and age, body size, and sex
Source: PubMed Central journal article supplement (PMC4591705; doi:10.1186/s12983-015-0120-2), 2015-10-01
Supplement: 12983_2015_120_MOESM2_ESM.pdf [file 12983_2015_120_MOESM2_ESM.pdf]

**Additional file 2.** Defensive chemicals ranked by quantity in individual skins of *Melanophryniscus moreirae* juveniles.

| MZUSP  | Rank Order by Quantity ( $\mu\text{g}$ per individual) |     |    |    |    |    |   |   |   |    |    |    |    | Color Code         |
|--------|--------------------------------------------------------|-----|----|----|----|----|---|---|---|----|----|----|----|--------------------|
|        | 1                                                      | 2   | 3  | 4  | 5  | 6  | 7 | 8 | 9 | 10 | 11 | 12 | 13 |                    |
| 154107 | 257                                                    | 27  | 22 | 16 | 15 | 10 | 4 | 2 | 2 | 2  |    |    |    | <b>Bufotenine</b>  |
| 154108 | 195                                                    | 121 | 35 | 11 | 4  | 4  | 4 | 3 | 3 | 3  | 1  | 1  | 0  | 5,6,8-I 277E       |
| 154147 | 2                                                      |     |    |    |    |    |   |   |   |    |    |    |    | 5,6,8-I 279F       |
| 154148 | 62                                                     |     |    |    |    |    |   |   |   |    |    |    |    | 5,6,8-I 279F iso 1 |
| 154149 | 20                                                     | 5   | 2  |    |    |    |   |   |   |    |    |    |    | 5,6,8-I 295G       |
| 154150 | 34                                                     | 22  | 9  | 4  | 2  | 1  | 1 | 1 |   |    |    |    |    | 5,8-I 241K         |
| 154151 | 7                                                      |     |    |    |    |    |   |   |   |    |    |    |    | 5,8-I 297G         |
|        |                                                        |     |    |    |    |    |   |   |   |    |    |    |    | aPTX 323B          |
|        |                                                        |     |    |    |    |    |   |   |   |    |    |    |    | aPTX 323B iso 1    |
|        |                                                        |     |    |    |    |    |   |   |   |    |    |    |    | aPTX 337D          |
|        |                                                        |     |    |    |    |    |   |   |   |    |    |    |    | hPTX 281K          |
|        |                                                        |     |    |    |    |    |   |   |   |    |    |    |    | PTX 265D           |
|        |                                                        |     |    |    |    |    |   |   |   |    |    |    |    | PTX 267C           |
|        |                                                        |     |    |    |    |    |   |   |   |    |    |    |    | PTX 267C iso 1     |
|        |                                                        |     |    |    |    |    |   |   |   |    |    |    |    | PTX 295F           |
|        |                                                        |     |    |    |    |    |   |   |   |    |    |    |    | PTX 323A           |
|        |                                                        |     |    |    |    |    |   |   |   |    |    |    |    | UNCLASS 237W       |
|        |                                                        |     |    |    |    |    |   |   |   |    |    |    |    | TRI 265S           |
|        |                                                        |     |    |    |    |    |   |   |   |    |    |    |    | UNCLASS 251GG      |

Chemicals are color-coded and their quantities ( $\mu\text{g}$  per individual) are reported in each cell. Abbreviations: 5,6,8-I, 5,6,8-trisubstituted indolizidine; 5,8-I, 5,8-disubstituted indolizidine; aPTX, allopumiliotoxin; hPTX, homopumiliotoxin; iso, isomer; PTX, pumiliotoxin; TRI, tricyclic; Unclass, unclassified as to structure.
