# Supplementary material for: The relationship between poison frog chemical defenses and age, body size, and sex
Source: PubMed Central journal article supplement (PMC4591705; doi:10.1186/s12983-015-0120-2), 2015-10-01
Supplement: 12983_2015_120_MOESM4_ESM.pdf [file 12983_2015_120_MOESM4_ESM.pdf]

**Table S1.** Results of non-parametric multiple regression analyses (9999 permutations; two-tailed tests; 3 and 51 degrees of freedom) of Brazilian red-belly toad chemical defenses in relation to sex, skin mass, and age following exclusion of the seven juvenile specimens. Statistically significant *P*-values are marked in **bold**.

|                            | Alkaloid Richness |            |               | Alkaloid Quantity |               |        | Bufotenine Quantity |               |          |
|----------------------------|-------------------|------------|---------------|-------------------|---------------|--------|---------------------|---------------|----------|
|                            | Sex               | Skin Mass  | Age           | Sex               | Skin Mass     | Age    | Sex                 | Skin Mass     | Age      |
| Regression coefficient     | 0.2207798         | 0.0037913  | 1.1439251     | 149.7665          | 1.24970       | 48.684 | 24.74898            | 0.570354      | 0.067456 |
| <i>P</i>                   | 0.8909            | 0.7964     | <b>0.0205</b> | 0.1583            | 0.1787        | 0.1169 | 0.4527              | <b>0.0483</b> | 0.9945   |
| <i>R</i> <sup>2</sup>      |                   | 0.1100187  |               |                   | 0.3212327     |        |                     | 0.2443528     |          |
| <i>R</i> <sup>2</sup> -adj |                   | 0.05766691 |               |                   | 0.2813052     |        |                     | 0.199903      |          |
| <i>F</i>                   |                   | 7.348518   |               |                   | 8.045402      |        |                     | 5.497271      |          |
| <i>P</i>                   |                   | 0.1095     |               |                   | <b>0.0001</b> |        |                     | <b>0.0025</b> |          |
